# Supplementary material for: Nonfamilial early-onset Alzheimer's disease associated with de novo PSEN1 mutation: A case report and review of the literature
Source: Research Square preprint supplement (doi:10.21203/rs.3.rs-4360435/v1), 2024-05-30
Supplement: Supplementary file 1 [file 91fa72ba82c52035b04e98ff.xlsx]

## Sheet: Tables
Table 1 Clinical characteristics of the patients carrying the PSEN1 G206D variant
	Patient 11	Patient 21	Patient 32	Patient 43
Sex	Female	Female	Male	Female
Age of onset	39y	37y	45y	33y
Country	Taiwan, China	Taiwan, China	Puerto Rico	Taiwan, China
Family history	Yes	Yes	Mother was diagnosed with dementia by 70 y	Father died before 65 y with demented features
Clinical characteristics	First year: miscalculate, lose belongings and poor concentration.	Progressive memory impairment;	Work impairment and poor concentration,	Memory impairment and seizures.
	Second year: difficulty in getting dressed, using abusive language.	Second year: comprehension and naming ability, ideomotor apraxia. Following 2 years: deteriorations in memory, language domains and ADL, generalized seizures.	gradually had difficulty in driving.
	Third year: gait disturbance, generalized seizures, myoclonus, dysphonia and violent behavior.		Fifth year: non-verbal and sexually aggressive.
Neuropsychological tests	First year: MMSE 11/30; Second year: MMSE 0/30, NPI 96/144	Second year: MMSE 17/30, NPI 20/144.	The fourth year: MMSE 25/30.	—
		Third year: moderate dementia.	Sixth year: MMSE 10/30.
Cranial MRI	Temporal lobe atrophy and hydrocephalus.	Frontal, parietal and temporal lobes atrophy.	Unremarkable	—
PET and biopsy	Aβ and P-tau depositions in frontal cortex tissue.	—	Decreased metabolism in posterior parietal and temporal lobes.	—
Treatment and efficacy	Hydrocephalus surgery did not improve cognition.	—	No response to	—
			donepezil or memantine.
Abbreviation: PSEN, presenilin; ADL, Activity of Daily Living; MMSE, Mini-Mental State Examination; NPI, Neuropsychiatric Inventory; MRI, magnetic resonance imaging; PET, positron emission tomography; Aβ, β amyloid; P-tau, phosphorylated tau.
